# Supplementary material
Source: PubMed Central journal article supplement (PMC2880864)
Supplement: NIHMS168197-supplement-01.pdf [file NIHMS168197-supplement-01.pdf]

**Supplemental Table:** Conservation across species of the novel *RYR2* variants. In Red mutations, in blue polymorphisms

|                         | <b>E243K</b>    | <b>F329L</b>                  | <b>R332W</b>                 |
|-------------------------|-----------------|-------------------------------|------------------------------|
| Homo sapiens            | LLHGHMDECLTVPSG | ADVKSTAF <sup>F</sup> TFRSSKE | KSTAF <sup>T</sup> FRSSKEKLD |
| Canis familiaris        | LLHGHMDECLTVPSG | ADVKSTAF <sup>F</sup> TFRSSKE | KSTAF <sup>T</sup> FRSSKEKLD |
| Equus caballus          | LLHGHMDECLTVPSG | ADVKSTAF <sup>F</sup> TFRSSKE | KSTAF <sup>T</sup> FRSSKEKLD |
| Gallus gallus           | LLHGHMDECLTVPSG | ADIKSTAF <sup>F</sup> CFRSSKE | KSTAF <sup>C</sup> FRSSKEKLD |
| Macaca mulatta          | LLHGHMDECLTVPSG | ADVKSTAF <sup>F</sup> TFRSSKE | KSTAF <sup>T</sup> FRSSKEKLD |
| Monodelphis domestica   | LLHGHMDECLTVPSG | ADVKSTAF <sup>F</sup> SFRSSKE | KSTAF <sup>S</sup> FRSSKEKLD |
| Mus musculus            | LLHGHMDECLTVPSG | ADVKSTAF <sup>F</sup> AFRSSKE | KSTAF <sup>A</sup> FRSSKEKLD |
| Ornithorhynchus anatinu | LLHGHMDECLTVPSG | ADVKSTAF <sup>F</sup> CFRSSKE | KSTAF <sup>C</sup> FRSSKEKLD |
| Otolemur garnettii      | LLHGHMDECLTVPSG | ADVKSTAF <sup>F</sup> TFRSSKE | KSTAF <sup>T</sup> FRSSKEKLD |
| Pan troglodytes         | LLHGHMDECLTVPSG | ADVKSTAF <sup>F</sup> TFRSSKE | KSTAF <sup>T</sup> FRSSKEKLD |
| Rattus norvegicus       | LLHGHMDECLTVPSG | ADVKSTAF <sup>F</sup> AFRSSKE | KSTAF <sup>A</sup> FRSSKEKLD |
| Sorex araneus           | LLHGHMDECLTVPSG | ADVKSTAF <sup>F</sup> AFRSSKE | KSTAF <sup>A</sup> FRSSKEKLD |

  

|                         | <b>G357S</b>                                                        | <b>V377M</b>                                                                    | <b>T415R</b>                 |
|-------------------------|---------------------------------------------------------------------|---------------------------------------------------------------------------------|------------------------------|
| Homo sapiens            | GTSEIKY <sup>G</sup> D <sup>S</sup> V <sup>C</sup> Y <sup>I</sup> Q | LWLTYQ <sup>S</sup> V <sup>D</sup> V <sup>K</sup> S <sup>V</sup> R <sup>M</sup> | SQHEESR <sup>T</sup> ARVIRST |
| Canis familiaris        | GTSEIKY <sup>G</sup> D <sup>S</sup> V <sup>C</sup> Y <sup>I</sup> Q | LWLTYQ <sup>S</sup> V <sup>D</sup> V <sup>K</sup> S <sup>V</sup> R <sup>M</sup> | SQHEESR <sup>T</sup> ARVIRST |
| Equus caballus          | GTSEIKY <sup>G</sup> D <sup>S</sup> V <sup>C</sup> Y <sup>I</sup> Q | LWLTYQ <sup>S</sup> V <sup>D</sup> V <sup>K</sup> S <sup>V</sup> R <sup>M</sup> | SQHEESR <sup>T</sup> ARVIRST |
| Gallus gallus           | GTPEIKY <sup>G</sup> D <sup>S</sup> I <sup>C</sup> F <sup>I</sup> Q | LWLSYQ <sup>S</sup> A <sup>D</sup> A <sup>K</sup> S <sup>V</sup> R <sup>M</sup> | SQHEESR <sup>T</sup> ARVIRST |
| Macaca mulatta          | GTSEIKY <sup>G</sup> D <sup>S</sup> V <sup>C</sup> Y <sup>I</sup> Q | LWLTYQ <sup>S</sup> V <sup>D</sup> V <sup>K</sup> S <sup>V</sup> R <sup>M</sup> | SQHEESR <sup>T</sup> ARVIRST |
| Monodelphis domestica   | GTSEIKY <sup>G</sup> D <sup>S</sup> V <sup>C</sup> Y <sup>I</sup> Q | LWLTYQ <sup>S</sup> V <sup>D</sup> V <sup>K</sup> S <sup>V</sup> R <sup>M</sup> | SQHEESR <sup>T</sup> ARVIRST |
| Mus musculus            | GTSEIKY <sup>G</sup> D <sup>S</sup> I <sup>C</sup> Y <sup>I</sup> Q | LWLTYQ <sup>A</sup> V <sup>D</sup> V <sup>K</sup> S <sup>A</sup> R <sup>M</sup> | SQHEESR <sup>T</sup> ARVIRST |
| Ornithorhynchus anatinu | GTSEIKY <sup>G</sup> D <sup>S</sup> V <sup>C</sup> F <sup>I</sup> Q | LWLTYQ <sup>S</sup> A <sup>D</sup> A <sup>K</sup> S <sup>V</sup> R <sup>M</sup> | SQHEESR <sup>T</sup> ARVIRST |
| Otolemur garnettii      | GTSEIKY <sup>G</sup> D <sup>S</sup> V <sup>C</sup> F <sup>I</sup> Q | LWLTYQ <sup>S</sup> V <sup>D</sup> V <sup>K</sup> S <sup>V</sup> R <sup>M</sup> | NK--ESR <sup>T</sup> GRVIRSN |
| Pan troglodytes         | GTSEIKY <sup>G</sup> D <sup>S</sup> V <sup>C</sup> Y <sup>I</sup> Q | LWLTYQ <sup>S</sup> V <sup>D</sup> V <sup>K</sup> S <sup>V</sup> R <sup>M</sup> | SQHEESR <sup>T</sup> ARVIRST |
| Rattus norvegicus       | GTSEIKY <sup>G</sup> D <sup>S</sup> I <sup>C</sup> Y <sup>I</sup> Q | LWLTYQ <sup>A</sup> V <sup>D</sup> V <sup>K</sup> S <sup>A</sup> R <sup>M</sup> | SQHEESR <sup>T</sup> ARVIRST |
| Sorex araneus           | GTSEIKY <sup>G</sup> D <sup>S</sup> V <sup>C</sup> Y <sup>I</sup> Q | LWLTYQ <sup>S</sup> V <sup>D</sup> V <sup>K</sup> S <sup>V</sup> R <sup>M</sup> | SQHEESR <sup>T</sup> ARVIRST |

|                         | <b>R420Q</b>     | <b>V507I</b>                      | <b>A549V</b>       |
|-------------------------|------------------|-----------------------------------|--------------------|
| Homo sapiens            | SRTARVIRSTVFLFN  | ECIDRLH <b>V</b> YSSAAHF <b>A</b> | RGNRKNCAQFSGLD     |
| Canis familiaris        | SRTARVIRSTVFLFN  | ECIDRLH <b>V</b> YSSAAHF <b>A</b> | RGNRKNCAQFSGLD     |
| Equus caballus          | SRTARVIRSTVFLFN  | ECIDRLH <b>V</b> YSSAAHF <b>A</b> | RGNRKNCAQFSGLD     |
| Gallus gallus           | SRTARVIRSTVFLFN  | ECIDRLH <b>V</b> YSSAAHF <b>A</b> | RGNRKNCAQFSGLD     |
| Macaca mulatta          | SRTARVIRSTVFLFN  | ECIDRLH <b>V</b> YSSAAHF <b>A</b> | RGNRKNCAQFSGLD     |
| Monodelphis domestica   | SRTARVIRSTVFLFN  | ECIDRLH <b>V</b> YSSAAHF <b>A</b> | RGNRKNCAQFSGLD     |
| Mus musculus            | SRTARVIRSTVFLFN  | ECIDRLH <b>V</b> YSSAAHF <b>A</b> | RGNRKNCAQFSGLD     |
| Ornithorhynchus anatinu | SRTARVIRSTAFLEFN | ECIDRLH <b>V</b> YSSAAHF <b>A</b> | RGNRKNCAQFSGLD     |
| Otolemur garnettii      | SRTGRVIRSNVFLFN  | XXXXXXXXXXXXXXXXXX                | XXXXXXXXXXXXXXXXXX |
| Pan troglodytes         | SRTARVIRSTVFLFN  | ECIDRLH <b>V</b> YSSAAHF <b>A</b> | RGNRKNCAQFSGLD     |
| Rattus norvegicus       | SRTARVIRSTVFLFN  | ECIDRLH <b>V</b> YSSAAHF <b>A</b> | RGNRKNCAQFSGLD     |
| Sorex araneus           | SRTARVIRSTVFLFN  | XXXXXXXXXXXXXXXXXX                | XXXXXXXXXXXXXXXXXX |

|                         | <b>R739H</b>             | <b>R1013Q</b>            | <b>T1107M</b>                              |
|-------------------------|--------------------------|--------------------------|--------------------------------------------|
| Homo sapiens            | LWSGCIAR <b>T</b> VSSPNQ | VWARDRI <b>R</b> QGWTYGI | RWYF <b>E</b> F <b>E</b> T <b>V</b> TAGDMR |
| Canis familiaris        | LWSGCIAR <b>T</b> VSSPNQ | VWARDRI <b>R</b> QGWTYGI | RWYF <b>E</b> F <b>E</b> T <b>V</b> TAGDMR |
| Equus caballus          | LWSGCIAR <b>T</b> VSSPNQ | VWARDRV <b>R</b> QGWTYGI | RWYF <b>E</b> F <b>E</b> T <b>V</b> TAGDMR |
| Gallus gallus           | LWSGCVAR <b>T</b> VNSPNQ | VWARDRI <b>R</b> QGWTYGI | KWYF <b>E</b> F <b>E</b> A <b>V</b> TAGDMR |
| Macaca mulatta          | LWSGCIAR <b>T</b> VSSPNQ | VWARDRI <b>R</b> QGWTYGI | RWYF <b>E</b> F <b>E</b> T <b>V</b> TAGDMR |
| Monodelphis domestica   | LWSGCIAR <b>T</b> VSSPNQ | VWARDRI <b>R</b> QGWTYGI | RWYF <b>E</b> F <b>E</b> A <b>V</b> TAGDMR |
| Mus musculus            | LWSGCIAR <b>T</b> VSSPNQ | VWARDRI <b>R</b> QGWTYGI | RWYF <b>E</b> F <b>E</b> A <b>V</b> TAGDMR |
| Ornithorhynchus anatinu | LWSGCIAR <b>T</b> VSSPNQ | VWARDRI <b>R</b> QGWTYGI | RWYF <b>E</b> F <b>E</b> A <b>V</b> TAGDMR |
| Otolemur garnettii      | LWSGCIAR <b>T</b> VSSPNQ | V-SRDR <b>I</b> RQGWTYGI | XXXXXXXXXXXXXXXXXX                         |
| Pan troglodytes         | LWSGCIAR <b>T</b> VSSPNQ | VWARDRI <b>R</b> QGWTYGI | RWYF <b>E</b> F <b>E</b> T <b>V</b> TAGDMR |
| Rattus norvegicus       | LWSGCIAR <b>T</b> VSSPNQ | VWARDRI <b>R</b> QGWTYGI | RWYF <b>E</b> F <b>E</b> A <b>V</b> TAGDMR |
| Sorex araneus           | LWSXXXXXXXXXXQ           | VWARDRI <b>R</b> QGWTYGI | RWYF <b>E</b> F <b>E</b> A <b>V</b> TAGDMR |

|                         | <b>A1136V</b>            | <b>E1837K</b>            | <b>E2045G</b>            |
|-------------------------|--------------------------|--------------------------|--------------------------|
| Homo sapiens            | GSDERAF <b>A</b> FDGFKAQ | IMGIFHN <b>E</b> DLKHILQ | YLKKKQA <b>E</b> KPVESDS |
| Canis familiaris        | GSDEHAF <b>A</b> FDGFKAQ | IMGIFHN <b>E</b> DLKHILQ | YLKKKQA <b>E</b> KPIESDS |
| Equus caballus          | GSDECAF <b>A</b> FDGFKAQ | IMGIFHN <b>E</b> DLKHILQ | YLKKKQA <b>E</b> KPVESDS |
| Gallus gallus           | GSDEEAF <b>V</b> FDGFKAQ | IMGIFHN <b>G</b> DLKHILQ | YLKKKQA <b>E</b> KPVDDDA |
| Macaca mulatta          | GSDERAF <b>A</b> FDGFKAQ | IMGIFHN <b>E</b> DLKHILQ | YLKKKQA <b>E</b> KPVESDS |
| Monodelphis domestica   | GSDEQAF <b>A</b> FDGFKAQ | IMGIFNN <b>E</b> DLKHILQ | YLKKKQT <b>E</b> KPIENDS |
| Mus musculus            | GSDDRAF <b>A</b> FDGFKAQ | IMGIFHN <b>E</b> DLKHILQ | YLKKKQA <b>E</b> KPVASDS |
| Ornithorhynchus anatinu | GSDEHAF <b>A</b> FDGFKAQ | IMGVFHD <b>G</b> DLKHVLR | YLKKKQA <b>Q</b> RPVDGYS |
| Otolemur garnettii      | XXXXXXXXXXXXXXXXXAQ      | IMGVFHN <b>E</b> DLKHILQ | YLKKKQA <b>E</b> KPIESDL |
| Pan troglodytes         | GSDERAF <b>A</b> FDGFKAQ | IMGIFHN <b>E</b> DLKHILQ | YLKKKQA <b>E</b> KPVESDS |
| Rattus norvegicus       | GSDERAF <b>A</b> FDGFKAQ | IMGIFHN <b>E</b> DLKHILQ | YLKKKQA <b>E</b> KPVASDS |
| Sorex araneus           | GSDDRAF <b>A</b> FDGFKAQ | IMGVFHN <b>E</b> DLKHILQ | XXXXXXXXXXXXXXXXXXX      |

|                         | <b>Y2156C</b>            | <b>H2168Q</b>            | <b>E2183V</b>            |
|-------------------------|--------------------------|--------------------------|--------------------------|
| Homo sapiens            | IMNNKVF <b>Y</b> QHPNLMR | LMRALGM <b>H</b> ETVMEVM | VNVLGGG <b>E</b> SKEITFP |
| Canis familiaris        | IMNNKVF <b>Y</b> QHPNLMR | LMRALGM <b>H</b> ETVMEVM | VNVLGGG <b>E</b> SKEITFP |
| Equus caballus          | IMNNKVF <b>Y</b> QHPNLMR | LMRALGM <b>H</b> ETVMEVM | VNVLGGG <b>E</b> SKEITFP |
| Gallus gallus           | IMNNKVF <b>Y</b> QHPNLMR | LMRALGM <b>H</b> ETVMEVM | VNVLGGG <b>E</b> SKEITFP |
| Macaca mulatta          | IMNNKVF <b>Y</b> QHPNLMR | LMRALGM <b>H</b> ETVMEVM | VNVLGGG <b>E</b> SKEITFP |
| Monodelphis domestica   | IMNNKVF <b>Y</b> QHPNLMR | LMRALGM <b>H</b> ETVMEVM | VNVLGGG <b>E</b> SKEITFP |
| Mus musculus            | IMNNKVF <b>Y</b> QHPNLMR | LMRALGM <b>H</b> ETVMEVM | VNVLGGG <b>E</b> SKEITFP |
| Ornithorhynchus anatinu | LPYAEH <b>S</b> TQRPNLMR | LMRALGM <b>H</b> ETVMEVM | VNVLGGG <b>E</b> MKEITFP |
| Otolemur garnettii      | IMNNKVF <b>Y</b> QHPNLMR | LMRALGM <b>H</b> ETVMEVM | VNVLGGG <b>E</b> SKXXXXX |
| Pan troglodytes         | IMNNKVF <b>Y</b> QHPNLMR | LMRALGM <b>H</b> ETVMEVM | VNVLGGG <b>E</b> SKEITFP |
| Rattus norvegicus       | IMNNKVF <b>Y</b> QHPNLMR | LMRALGM <b>H</b> ETVMEVM | VNVLGGG <b>E</b> SKEITFP |
| Sorex araneus           | IMNNKVF <b>Y</b> QHPNLMR | LMRALGM <b>H</b> ETVMEVM | VNVLGGG <b>E</b> SKEITFP |

|                         | <b>D2216V</b>            | <b>E2296Q</b>            | <b>R2420W</b>            |
|-------------------------|--------------------------|--------------------------|--------------------------|
| Homo sapiens            | QNQKAMF <b>D</b> HLSYLLE | GWNPVEG <b>E</b> RYLDFLR | KGEAIRI <b>R</b> SILRSLI |
| Canis familiaris        | QNQKAMF <b>D</b> HLSYLLE | GWNPVEG <b>E</b> RYLDFLR | KGEAIRI <b>R</b> SILRSLI |
| Equus caballus          | QNQKAMF <b>D</b> HLSYLLE | GWNPVEG <b>E</b> RYLDFLR | KGEAIRI <b>R</b> SILRSLI |
| Gallus gallus           | QNQKAMF <b>D</b> HLSYLLE | GWNPVEG <b>E</b> RYLDFLR | KGEAIRI <b>R</b> SILRSLI |
| Macaca mulatta          | QNQKAMF <b>D</b> HLSYLLE | GWNPVEG <b>E</b> RYLDFLR | KGEAIRI <b>R</b> SILRSLI |
| Monodelphis domestica   | QNQKAMF <b>D</b> HLSYLLE | GWNPVEG <b>E</b> RYLDFLR | KGEAIRI <b>R</b> SILRSLI |
| Mus musculus            | QNQKAMF <b>D</b> HLSYLLE | GWNPVEG <b>E</b> RYLDFLR | KGEAIRI <b>R</b> SILRSLI |
| Ornithorhynchus anatinu | QNQKAMF <b>D</b> HLSYLLE | GWNPVEG <b>E</b> RYLDFLR | KGEAIRI <b>R</b> SILRSLI |
| Otolemur garnettii      | XXXXXXXXXXXXXXXXXX       | GWNPVEG <b>E</b> RYLDFLR | XGEATRI <b>R</b> SILRSLI |
| Pan troglodytes         | QNQKAMF <b>D</b> HLSYLLE | GWNPVEG <b>E</b> RYLDFLR | KGEAIRI <b>R</b> SILRSLI |
| Rattus norvegicus       | QNQKAMF <b>D</b> HLSYLLE | GWNPVEG <b>E</b> RYLDFLR | KGEAIRI <b>R</b> SILRSLI |
| Sorex araneus           | QNQKAMF <b>D</b> HLSYLLE | GWNPVEG <b>E</b> RYLDFLR | KGEAIRI <b>R</b> SILRSLI |

|                         | <b>M3972I</b>            | <b>D3973H</b>           | <b>L3974Q</b>           |
|-------------------------|--------------------------|-------------------------|-------------------------|
| Homo sapiens            | IELLKEL <b>M</b> DLQKDMV | ELLKEL <b>M</b> DLQKDMV | LLKEL <b>M</b> DLQKDMVM |
| Canis familiaris        | IELLKEL <b>M</b> DLQKDMV | ELLKEL <b>M</b> DLQKDMV | LLKEL <b>M</b> DLQKDMVM |
| Equus caballus          | IELLKEL <b>M</b> DLQKDMV | ELLKEL <b>M</b> DLQKDMV | LLKEL <b>M</b> DLQKDMVM |
| Gallus gallus           | IELLKEL <b>M</b> DLQKDMV | ELLKEL <b>M</b> DLQKDMV | LLKEL <b>M</b> DLQKDMVM |
| Macaca mulatta          | IELLKEL <b>M</b> DLQKDMV | ELLKEL <b>M</b> DLQKDMV | LLKEL <b>M</b> DLQKDMVM |
| Monodelphis domestica   | IELLKEL <b>M</b> DLQKDMV | ELLKEL <b>M</b> DLQKDMV | LLKEL <b>M</b> DLQKDMVM |
| Mus musculus            | IELLKEL <b>M</b> DLQKDMV | ELLKEL <b>M</b> DLQKDMV | LLKEL <b>M</b> DLQKDMVM |
| Ornithorhynchus anatinu | IELLKEL <b>M</b> DLQKDMV | ELLKEL <b>M</b> DLQKDMV | LLKEL <b>M</b> DLQKDMVM |
| Otolemur garnettii      | IELLKEL <b>M</b> DLQKDMV | ELLKEL <b>M</b> DLQKDMV | LLKEL <b>M</b> DLQKDMVM |
| Pan troglodytes         | IELLKEL <b>M</b> DLQKDMV | ELLKEL <b>M</b> DLQKDMV | LLKEL <b>M</b> DLQKDMVM |
| Rattus norvegicus       | IELLKEL <b>M</b> DLQKDMV | ELLKEL <b>M</b> DLQKDMV | LLKEL <b>M</b> DLQKDMVM |
| Sorex araneus           | IELLKEL <b>M</b> DLQKDMV | ELLKEL <b>M</b> DLQKDMV | LLKEL <b>M</b> DLQKDMVM |

|                         | <b>K3997E</b>            | <b>S4124G</b>            | <b>Y4149S</b>            |
|-------------------------|--------------------------|--------------------------|--------------------------|
| Homo sapiens            | VVNGTIG <b>K</b> QMVDMLV | TFLELAE <b>S</b> VLNYFQP | AKRIERV <b>Y</b> FEISESS |
| Canis familiaris        | VVNGTIG <b>K</b> QMVDMLV | TFLELAE <b>S</b> VLNYFQP | AKRIERV <b>Y</b> FEISESS |
| Equus caballus          | VVNGTIG <b>K</b> QMVDMLV | TFLELAE <b>S</b> VLNYFQP | AKRIERV <b>Y</b> FEISESS |
| Gallus gallus           | VVNGTIG <b>K</b> QMVDMLV | TFLELSE <b>S</b> VLNYFQP | AKRIERV <b>Y</b> FEISESS |
| Macaca mulatta          | VVNGTIG <b>K</b> QMVDMLV | TFLELAE <b>S</b> VLNYFQP | AKRIERV <b>Y</b> FEISESS |
| Monodelphis domestica   | VVNGTIG <b>K</b> QMVDMLV | TFLELAE <b>S</b> VLNYFQP | AKRIERV <b>Y</b> FEISESS |
| Mus musculus            | VVNGTIG <b>K</b> QMVDMLV | TFLELAE <b>S</b> VLNYFQP | AKRIERV <b>Y</b> FEISESS |
| Ornithorhynchus anatinu | VVNGTIG <b>K</b> QMVDMLV | TFLELAE <b>S</b> VLNYFQP | AKRIERV <b>Y</b> FEISESS |
| Otolemur garnettii      | VVNGTIG <b>K</b> QMVDMLV | TFLELAE <b>S</b> VLNYFQP | AKRIERV <b>Y</b> FEISESS |
| Pan troglodytes         | VVNGTIG <b>K</b> QMVDMLV | TFLELAE <b>S</b> VLNYFQP | AKRIERV <b>Y</b> FEISESS |
| Rattus norvegicus       | VVNGTIG <b>K</b> QMVDMLV | TFLELAE <b>S</b> VLNYFQP | AKRIERV <b>Y</b> FEISESS |
| Sorex araneus           | VVNGTIG <b>K</b> QMVDMLV | TFLELAE <b>S</b> VLNYFQP | AKRIERV <b>Y</b> FEISESS |

|                         | <b>R4157Q</b>            | <b>Q4159P</b>            | <b>N4178S</b>           |
|-------------------------|--------------------------|--------------------------|-------------------------|
| Homo sapiens            | FEISESS <b>R</b> TQWEKPQ | ISESSRT <b>Q</b> WEKPQVK | QFIFD <b>V</b> NEGGEKEK |
| Canis familiaris        | FEISESS <b>R</b> TQWEKPQ | ISESSRT <b>Q</b> WEKPQVK | QFIFD <b>V</b> NEGGEKEK |
| Equus caballus          | FEISESS <b>R</b> TQWEKPQ | ISESSRT <b>Q</b> WEKPQVK | QFIFD <b>V</b> NEGGEKEK |
| Gallus gallus           | FEISESS <b>R</b> TQWEKPQ | ISESSRT <b>Q</b> WEKPQVK | QFIFD <b>V</b> NEGGEKEK |
| Macaca mulatta          | FEISESS <b>R</b> TQWEKPQ | ISESSRT <b>Q</b> WEKPQVK | QFIFD <b>V</b> NEGGEKEK |
| Monodelphis domestica   | FEISESS <b>R</b> TQWEKPQ | ISESSRT <b>Q</b> WEKPQVK | QFIFD <b>V</b> NEGGEKEK |
| Mus musculus            | FEISESS <b>R</b> TQWEKPQ | ISESSRT <b>Q</b> WEKPQVK | QFIFD <b>V</b> NEGGEKEK |
| Ornithorhynchus anatinu | FEISESS <b>R</b> TQWEKPQ | ISESSRT <b>Q</b> WEKPQVK | QFIFD <b>V</b> NEGGEKEK |
| Otolemur garnettii      | FEISESS <b>R</b> TQWEKPQ | ISESSRT <b>Q</b> WEKPQVK | QFIFD <b>V</b> NEGGEKEK |
| Pan troglodytes         | FEISESS <b>R</b> TQWEKPQ | ISESSRT <b>Q</b> WEKPQVK | QFIFD <b>V</b> NEGGEKEK |
| Rattus norvegicus       | FEISESS <b>R</b> TQWEKPQ | ISESSRT <b>Q</b> WEKPQVK | QFIFD <b>V</b> NEGGEKEK |
| Sorex araneus           | FEISESS <b>R</b> TQWEKPQ | ISESSRT <b>Q</b> WEKPQVK | QFIFD <b>V</b> NEGGEKEK |

|                         | <b>E4187Q</b>            | <b>G4315E</b>              | <b>K4650E</b>            |
|-------------------------|--------------------------|----------------------------|--------------------------|
| Homo sapiens            | GGEKEKM <b>E</b> LFVNFCE | I ICSLLLL <b>G</b> GSLVEGA | NYWDKFV <b>K</b> RKVMDKY |
| Canis familiaris        | GGEKEKM <b>E</b> LFVNFCE | I ICSLLLL <b>G</b> GSLVEGA | NYWDKFV <b>K</b> RKVMDKY |
| Equus caballus          | GGEKEKM <b>E</b> LFVNFCE | I ICSLLLL <b>G</b> GSLVEGA | NYWDKFV <b>K</b> RKVMDKY |
| Gallus gallus           | GGEKEKM <b>E</b> LFVNFCE | I ICSLLLL <b>G</b> GSLVEGA | NYWDKFV <b>K</b> RKVMDKY |
| Macaca mulatta          | GGEKEKM <b>E</b> LFVNFCE | I ICSLLLL <b>G</b> GSLVEGA | NYWDKFV <b>K</b> RKVMDKY |
| Monodelphis domestica   | GGEKEKM <b>E</b> LFVNFCE | IMCSLLLL <b>G</b> GSLVEGA  | NYWDKFV <b>K</b> RKVMDKY |
| Mus musculus            | GGEKEKM <b>E</b> LFVNFCE | IVSSLLLL <b>G</b> GSLVEGA  | NYWDKFV <b>K</b> RKVMDKY |
| Ornithorhynchus anatinu | GGEKEKM <b>E</b> LFVSFCE | XXXSWLS <b>E</b> KCLGHGA   | NYWDKFV <b>K</b> RKVMDKY |
| Otolemur garnettii      | GGEKEKM <b>E</b> LFVNFCE | IVCSLLLL <b>G</b> ASLVEGA  | NYWDKFV <b>K</b> RKVMDKY |
| Pan troglodytes         | GGEKEKM <b>E</b> LFVNFCE | I ICSLLLL <b>G</b> GSLVEGA | NYWDKFV <b>K</b> RKVMDKY |
| Rattus norvegicus       | GGEKEKM <b>E</b> LFVNFCE | IVSSLLLL <b>G</b> GSLVEGA  | NYWDKFV <b>K</b> RKVMDKY |
| Sorex araneus           | GGEKEKM <b>E</b> LFVNFCE | I ICSLLLL <b>G</b> GSLVEGA | NYWDKFV <b>K</b> RKVMDKY |

|                         | <b>N4736Del</b>         | <b>R4790Q</b>            | <b>K4805R</b>                     |
|-------------------------|-------------------------|--------------------------|-----------------------------------|
| Homo sapiens            | SVLGHY <b>N</b> NFFFAAH | VVAFNFF <b>R</b> KFYNKSE | DGDT <b>P</b> DM <b>K</b> CDDMLTC |
| Canis familiaris        | SILGHY <b>N</b> NFFFAAH | VVAFNFF <b>R</b> KFYNKSE | DGDT <b>P</b> DM <b>K</b> CDDMLTC |
| Equus caballus          | SVLGHY <b>N</b> NFFFAAH | VVAFNFF <b>R</b> KFYNKSE | DGDT <b>P</b> DM <b>K</b> CDDMLTC |
| Gallus gallus           | SVLGHY <b>N</b> NFFFAAH | VVAFNFF <b>R</b> KFYNKSE | DGDMPDM <b>K</b> CDDMLTC          |
| Macaca mulatta          | SVLGHY <b>N</b> NFFFAAH | VVAFNFF <b>R</b> KFYNKSE | DGDMPDM <b>K</b> CDDMLTC          |
| Monodelphis domestica   | SVLGHY <b>N</b> NFFFAAH | VVAFNFF <b>R</b> KFYNKSE | DGDMPDM <b>K</b> CDDMLTC          |
| Mus musculus            | SVLGHY <b>N</b> NFFFAAH | VVAFNFF <b>R</b> KFYNKSE | DGDMPDM <b>K</b> CDDMLTC          |
| Ornithorhynchus anatinu | SVLGHY <b>N</b> NFFFAAH | VVAFNFF <b>R</b> KFYNKSE | DGDMPDM <b>K</b> CDDMLTC          |
| Otolemur garnettii      | SVLGHY <b>N</b> NFFFAAH | XXXXXXXXXXXXXXXXXX       | XXXXXXXXXXXXXXXXXX                |
| Pan troglodytes         | SVLGHY <b>N</b> NFFFAAH | VVAFNFF <b>R</b> KFYNKSE | DGDT <b>P</b> DM <b>K</b> CDDMLTC |
| Rattus norvegicus       | SVLGHY <b>N</b> NFFFAAH | VVAFNFF <b>R</b> KFYNKSE | DGDT <b>P</b> DM <b>K</b> CDDMLTC |
| Sorex araneus           | SVLGHY <b>N</b> NFFFAAH | VVAFNFF <b>R</b> KFYNKSE | DGDT <b>P</b> DM <b>K</b> CDDMLTC |

**R4822H**

|                         |                          |
|-------------------------|--------------------------|
| Homo sapiens            | FHMYVGV <b>R</b> AGGGIGD |
| Canis familiaris        | FHMYVGV <b>R</b> AGGGIGD |
| Equus caballus          | FHMYVGV <b>R</b> AGGGIGD |
| Gallus gallus           | FHMYVGV <b>R</b> AGGGIGD |
| Macaca mulatta          | FHMYVGV <b>R</b> AGGGIGD |
| Monodelphis domestica   | FHMYVGV <b>R</b> AGGGIGD |
| Mus musculus            | FHMYVGV <b>R</b> AGGGIGD |
| Ornithorhynchus anatinu | FHMYVGV <b>R</b> AGGGIGD |
| Otolemur garnettii      | FHMYVGV <b>R</b> AGGGIGD |
| Pan troglodytes         | FHMYVGV <b>R</b> AGGGIGD |
| Rattus norvegicus       | FHMYVGV <b>R</b> AGGGIGD |
| Sorex araneus           | FHMYVGV <b>R</b> AGGGIGD |
